# Supplementary material
Source: PubMed Central journal article supplement (PMC3869444)
Supplement: Supp_Figure1.pdf [file Supp_Figure1.pdf]

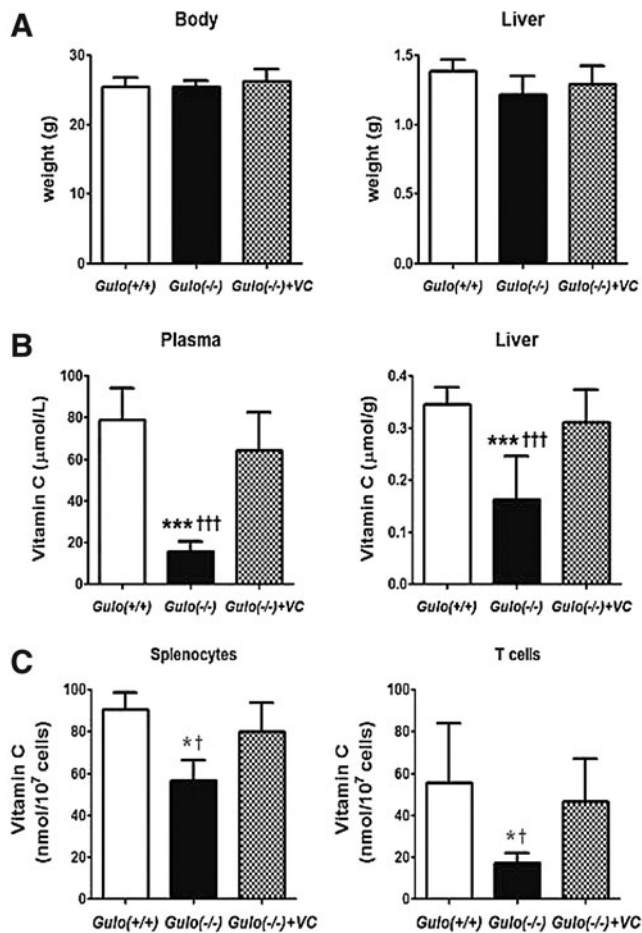

**SUPPLEMENTARY FIG. S1. General characteristics of *Gulo*(-/-) mice at 3 weeks after vitamin C withdrawal.** Characteristics of *Gulo*(-/-) mice upon vitamin C withdrawal after 3 weeks (A) Body and liver weight of WT [*Gulo*(+/+)], vitamin C-insufficient [*Gulo*(-/-)], and vitamin C-sufficient [*Gulo*(-/-)+VC] mice. *Gulo*(-/-) mice were maintained in the absence of supply of vitamin C for 3 weeks. (B) Levels of vitamin C in the plasma and liver [ $n=8-9$ , \*\*\* $p<0.001$  vs. WT mice, ††† $p<0.001$  vs. *Gulo*(-/-)+VC]. (C) The level of vitamin C in splenocytes and splenic T-cells [ $n=5$ , \* $p<0.05$  vs. WT mice, † $p<0.05$  vs. *Gulo*(-/-)+VC]. *Gulo*, L-gulonolactone- $\gamma$ -oxidase; WT, wild-type.
