# Supplementary material
Source: PubMed Central journal article supplement (PMC3869444)
Supplement: Supp_Figure2.pdf [file Supp_Figure2.pdf]

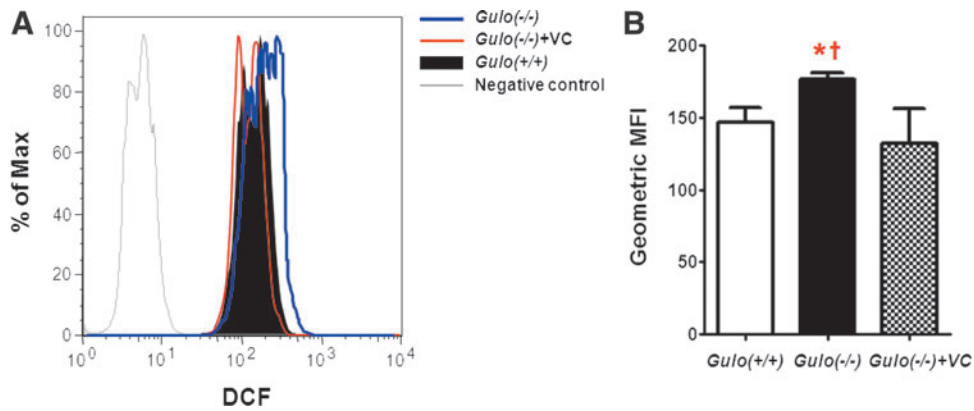

**SUPPLEMENTARY FIG. S2. Increase of ROS levels in the liver of vitamin C-insufficient *Gulo(-/-)* in response to Con A.** WT [*Gulo(+/+)*], vitamin C-insufficient [*Gulo(-/-)*], and vitamin C-sufficient [*Gulo(-/-)+VC*] mice were intravenously injected with 20  $\mu\text{g/g}$  of Con A or phosphate buffered saline (PBS). At 4 h after injection, the liver cells were isolated, and the intracellular ROS levels were measured by DCFA-DA, as described in the Supplementary Materials and Methods section. **(A)** Representative histogram. **(B)** Mean fluorescence intensity (MFI) of DCF is represented as the mean  $\pm$  SD [data were presented as the means  $\pm$  SDs. Newman-Keuls multiple comparison test was used to compare the all groups,  $n=3$ ,  $*p < 0.05$  vs. WT mice,  $^\dagger p < 0.05$  vs. *Gulo(-/-)+VC*]. Con A, concanavalin A; DCF, dichlorofluorescein; ROS, reactive oxygen species.
