# Supplementary material
Source: PubMed Central journal article supplement (PMC3869444)
Supplement: Supp_Figure3.pdf [file Supp_Figure3.pdf]

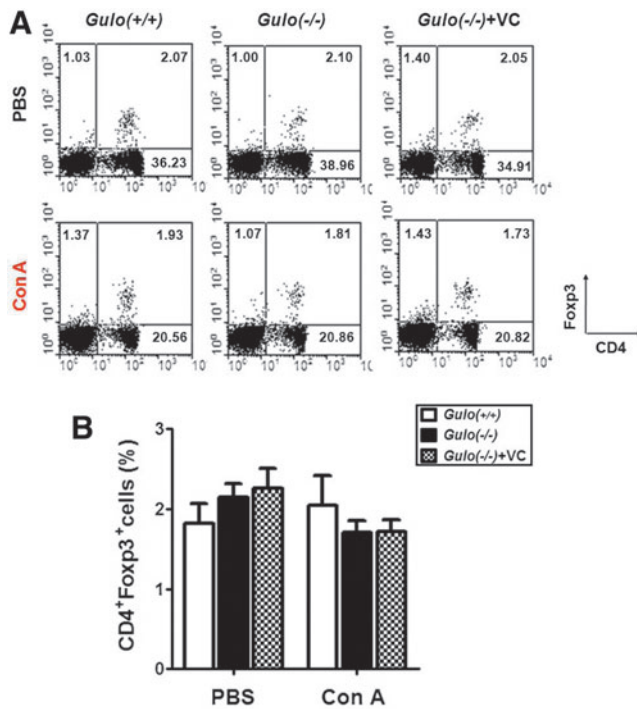

**SUPPLEMENTARY FIG. S3. The distribution of regulatory T-cells in the liver upon vitamin C withdrawal and supplementation response to Con A.** WT [*Gulo*(+/+)], vitamin C-insufficient [*Gulo*(-/-)], and vitamin C-sufficient [*Gulo*(-/-)+VC] mice intravenously injected with 20  $\mu$ g/g of Con A or PBS. After 6 h, liver MNCs were isolated, and the distribution of regulatory T-cell population was analyzed by intracellular flow cytometry analysis according to the manufacturer's protocols. **(A)** Representative dot plot. Numbers in the dot plots indicate the percentage of positive cells in each quadrant. **(B)** The percentage of CD4<sup>+</sup> Foxp3<sup>+</sup> cells was compared between each group ( $n=5$ ). MNCs, mononuclear cells.
