# Supplementary material
Source: PubMed Central journal article supplement (PMC3869444)
Supplement: Supp_Figure4.pdf [file Supp_Figure4.pdf]

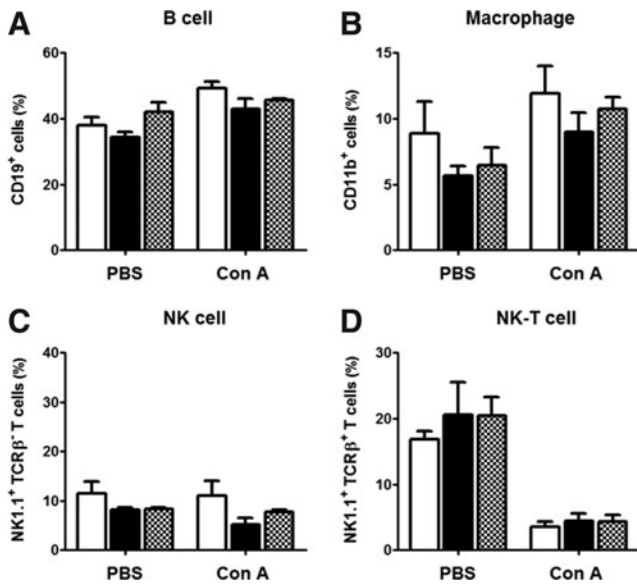

**SUPPLEMENTARY FIG. S4. Frequency of B-, Macrophage, NK, and NKT cells in liver MNCs in response to Con A.** WT [*Gulo*(+/+)], vitamin C-insufficient [*Gulo*(-/-)], and vitamin C-sufficient [*Gulo*(-/-)+VC] mice were intravenously injected with 20  $\mu$ g/g of Con A or PBS. At 6 h after injection, liver MNCs were isolated as described in the Materials and Methods section. The frequency of B-cells (CD19<sup>+</sup>, **A**), macrophages (CD11b<sup>+</sup>, **B**), NK cells (NK1.1<sup>+</sup> TCR $\beta$ <sup>-</sup>, **C**), and NK-T cells (NK1.1<sup>+</sup> TCR $\beta$ <sup>+</sup>, **D**) cells in liver MNCs were analyzed by flow cytometry analysis as described in the Supplementary Materials and Methods section ( $n=5$ , \*\* $p < 0.01$  vs. WT mice). NK, natural killer.
